# Supplementary material
Source: PubMed Central journal article supplement (PMC4805869)
Supplement: mmc1.pdf [file mmc1.pdf]

**Biophysical Journal**

**Supporting Material**

**Intra- and Intersubunit Dynamic Binding in Kv4.2 Channel Closed-State Inactivation**

Jessica Wollberg<sup>1</sup> and Robert Bähring<sup>1,\*</sup>

<sup>1</sup>Institut für Zelluläre und Integrative Physiologie, Zentrum für Experimentelle Medizin, Universitätsklinikum Hamburg-Eppendorf, Hamburg, Germany

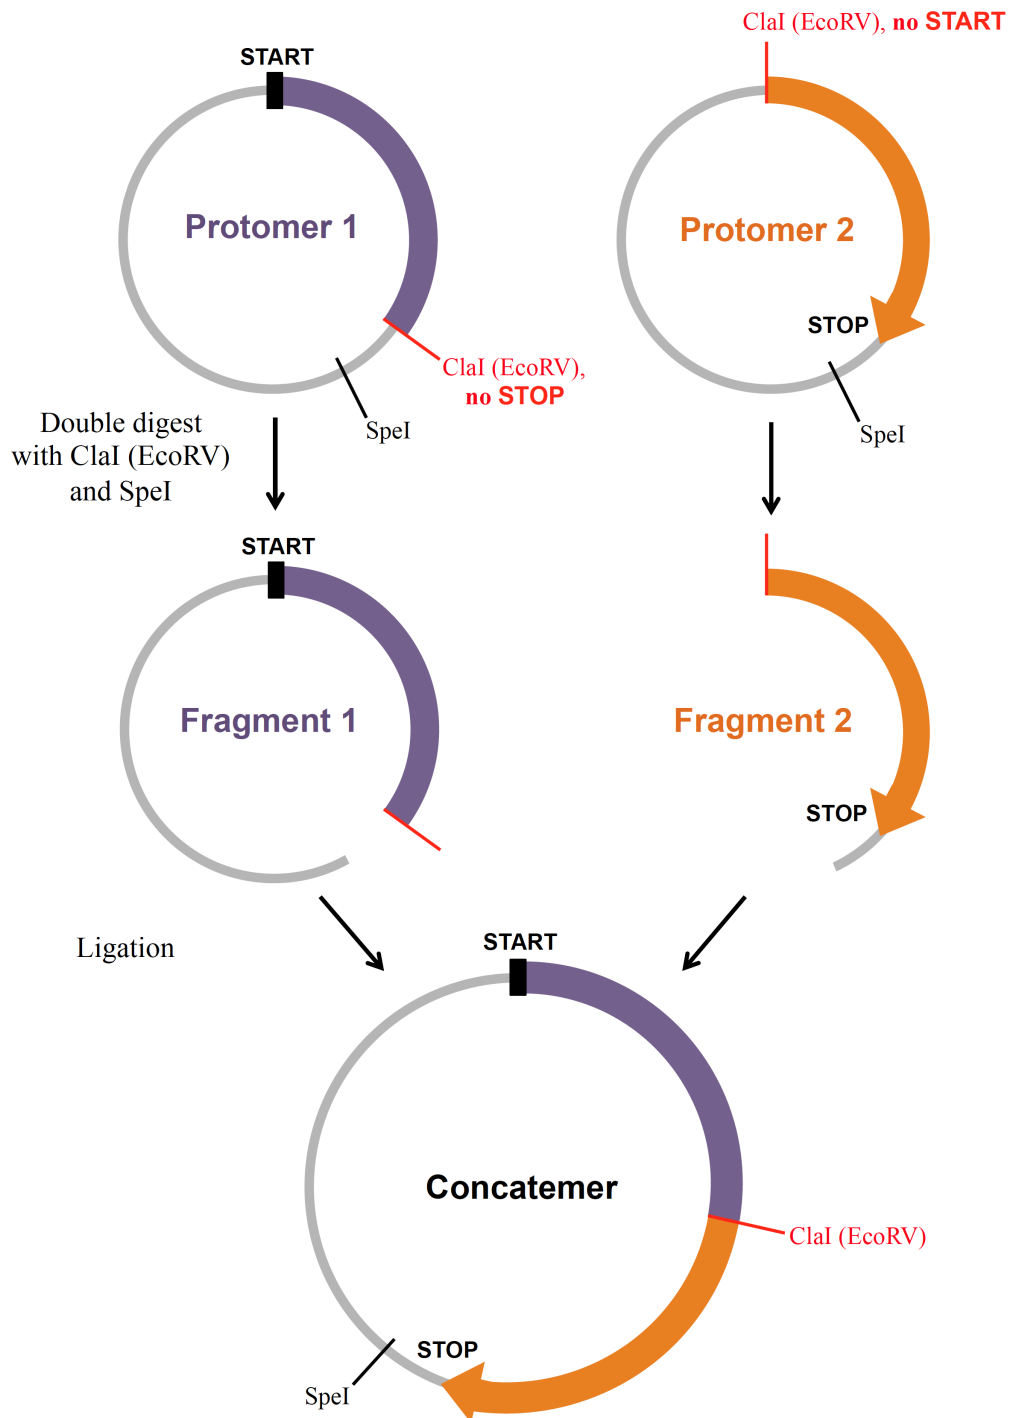

**FIGURE S1** Cloning strategy for the generation of concatenated Kv4.2 tandem-dimer cDNA. Protomer 1: Endogenous SpeI site and engineered unique six-bases restriction site for Clal (or EcoRV) instead of a stop codon (red); Kv4.2 coding sequence 1 in purple. Protomer 2: Endogenous SpeI site and engineered unique six-bases restriction site for Clal (or EcoRV) instead of a start codon (red); Kv4.2 coding sequence 2 in orange. Double digest with Clal (or EcoRV) and SpeI yields two different fragments: Fragment 1: START - Kv4.2 - Clal (EcoRV); Fragment 2: Clal (EcoRV) - Kv4.2 - STOP. Ligation (Fragment 2 into Fragment 1) results in concatenated cDNA (Concatemer). Point mutations were introduced before concatenation (i.e., in the protomers).

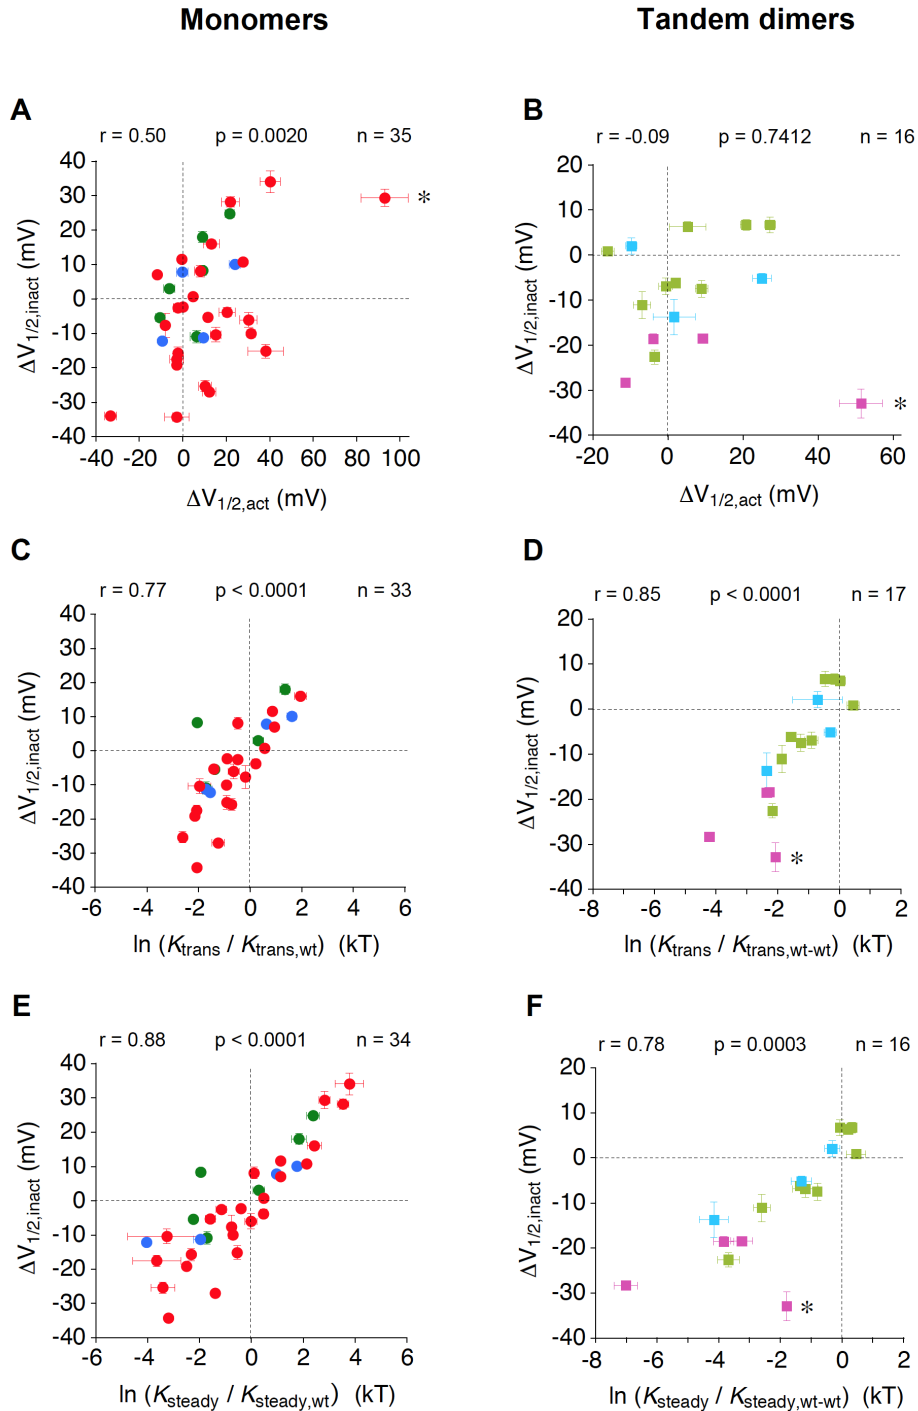

**FIGURE S2** Correlation analyses for effects on low-voltage inactivation and effects on the voltage dependences of activation and inactivation for Kv4.2 mutants. Left: monomers (green: S4S5 single mutants, blue: S6 single mutants, red: double mutants); right: tandem dimers (light green: single mutants, light blue: double mutants intra-subunit configuration, magenta: double mutants inter-subunit configuration). For each construct the mutation-induced shift in the voltage dependence of isochronal (30 s prepulse) inactivation ( $\Delta V_{1/2,inact}$ ) is plotted against the corresponding shift in the voltage dependence of peak conductance activation ( $\Delta V_{1/2,act}$ ; *A* and *B*), the corresponding change in affinity for the transitory state expressed as  $\ln(K_{trans}/K_{trans,wt})$  (*C*) or  $\ln(K_{trans}/K_{trans,wt-wt})$  (*D*) and the corresponding change in affinity for steady-state inactivation expressed as  $\ln(K_{steady}/K_{steady,wt})$  (*E*) or  $\ln(K_{steady}/K_{steady,wt-wt})$  (*F*; see Table S1 for the analysis of voltage dependences, and Materials and Methods for the quantification of mutation-induced effects on low-voltage inactivation). Intersection points of dashed lines represent the wild-type monomer (left) or the wild-type dimer (in the absence or presence of auxiliary subunits, right). Two-tailed Pearson correlation analysis ( $r$  = Pearson correlation coefficient) was employed to test for an interdependence between the plotted parameters ( $p < 0.05$ ). Significant correlations were found between the mutation-induced shift in the voltage dependence of inactivation and change in affinity for transitory and steady-state inactivation for both monomers and dimers. A significant correlation between the mutation-induced shifts in the voltage dependence of inactivation and activation was only found for the monomers. Asterisk in *A*: [311:408]; asterisks in *B*, *D* and *F*: [404]-[326] (see also Table S1).

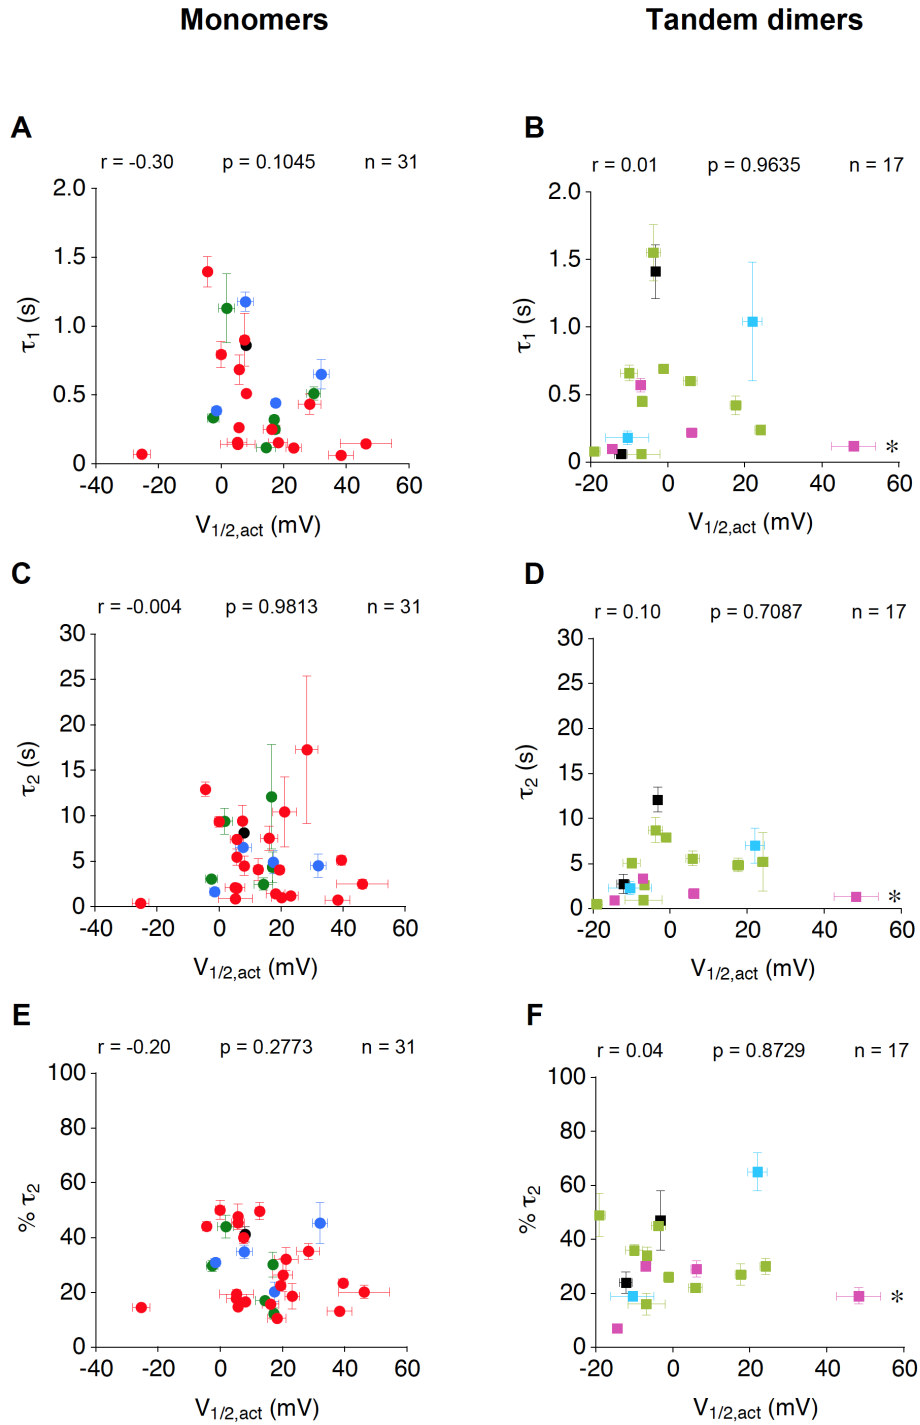

**FIGURE S3** Correlation analyses of low-voltage inactivation kinetics and the voltage dependence of activation for wild-type and mutant Kv4.2 channels. Left: monomers (black: wild-type, green: S4S5 single mutants, blue: S6 single mutants, red: double mutants); right: tandem dimers (black: wild-type dimer in the absence and presence of auxiliary subunits, light green: single mutants, light blue: double mutants intra-subunit configuration, magenta: double mutants inter-subunit configuration). For each construct  $\tau_1$  (A and B),  $\tau_2$  (C and D) and the percentage of the total decay (i.e., to reach ss) accounted for by  $\tau_2$  (E and F) is plotted against the corresponding voltage for half-maximal peak conductance activation ( $V_{1/2,act}$ , see also Tables S1 and S2). Two-tailed Pearson correlation analysis ( $r$  = Pearson correlation coefficient) was employed to test for an interdependence of the plotted parameters ( $p < 0.05$ ). No significant correlations were found. Asterisks in B, D and F: [404]-[326].

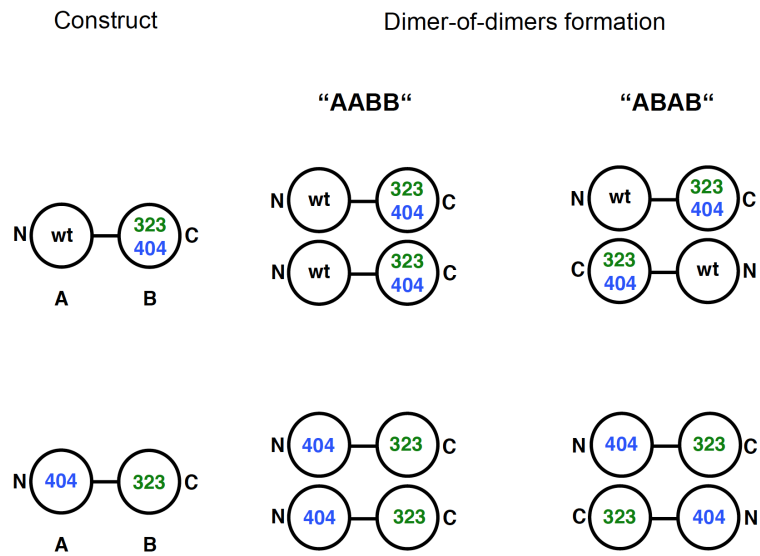

**FIGURE S4** Dimer-of-dimers formation with Kv4.2 constructs. Dimer formation is schematically illustrated for the intra dimer [wt]-[323:404] and the corresponding inter dimer [404]-[323] as examples. The dimers are defined by the two entities: A (harboring the N-terminus, N) and B (harboring the C-terminus, C). Two different principal arrangements (AABB or ABAB) can be distinguished. In the "adjacent" AABB configuration the two N-termini point in the same direction. In the ABAB configuration, which reflects the rotational symmetry of voltage-gated sodium and calcium channels, the two N-termini point in opposite directions.

**TABLE S1****Voltage dependence of activation and inactivation for monomeric and tandem-dimer Kv4.2 constructs**

|           | $V_{1/2,act}$<br>(mV) | $k_{act}$<br>(mV) | n  | $V_{1/2,inact}$<br>(mV) | $k_{inact}$<br>(mV) | n |
|-----------|-----------------------|-------------------|----|-------------------------|---------------------|---|
| [wt]      | +8.03 ± 0.56          | 29.9 ± 1.21       | 10 | -67.3 ± 0.58            | 5.91 ± 0.36         | 7 |
| [309]     | -2.47 ± 1.90          | 29.6 ± 0.61       | 5  | -75.0 ± 0.61            | 4.90 ± 0.13         | 5 |
| [311]     | +17.0 ± 1.08          | 29.8 ± 0.33       | 6  | -51.6 ± 1.57            | 7.44 ± 0.39         | 4 |
| [313]     | +14.4 ± 3.01          | 39.3 ± 3.62       | 5  | -80.4 ± 1.82            | 9.66 ± 1.93         | 4 |
| [322]     | +1.84 ± 2.62          | 25.7 ± 0.94       | 8  | -64.3 ± 1.03            | 6.05 ± 0.82         | 5 |
| [323]     | +17.3 ± 1.34          | 37.8 ± 1.52       | 7  | -79.1 ± 0.62            | 6.76 ± 0.24         | 6 |
| [326]     | +29.7 ± 2.16          | 35.4 ± 2.43       | 5  | -44.8 ± 0.50            | 6.86 ± 0.09         | 5 |
| [400]     | -                     | -                 |    | -96.3 ± 2.36            | 8.81 ± 0.52         | 3 |
| [404]     | +17.5 ± 0.68          | 36.3 ± 0.86       | 5  | -78.6 ± 0.54            | 6.60 ± 0.33         | 4 |
| [407]     | +7.80 ± 2.62          | 28.9 ± 1.09       | 3  | -61.8 ± 0.07            | 5.75 ± 0.18         | 3 |
| [408]     | +32.1 ± 2.49          | 35.8 ± 1.38       | 8  | -57.2 ± 0.87            | 6.48 ± 0.67         | 7 |
| [412]     | -1.44 ± 1.45          | 29.5 ± 1.07       | 3  | -81.7 ± 0.56            | 4.85 ± 0.35         | 3 |
| [309:404] | +20.2 ± 3.20          | 54.3 ± 3.92       | 6  | -96.6 ± 0.84            | 5.25 ± 0.26         | 6 |
| [309:407] | +5.80 ± 2.10          | 31.0 ± 0.68       | 5  | -72.1 ± 0.88            | 4.29 ± 0.34         | 5 |
| [309:408] | +21.2 ± 3.86          | 30.8 ± 1.17       | 5  | -53.5 ± 1.19            | 4.49 ± 0.32         | 5 |
| [309:412] | +39.5 ± 1.38          | 50.8 ± 2.71       | 3  | -79.6 ± 1.10            | 11.4 ± 0.66         | 4 |
| [311:400] | +12.7 ± 1.34          | 38.1 ± 1.20       | 3  | -68.9 ± 0.50            | 11.8 ± 0.24         | 3 |
| [311:404] | +19.5 ± 1.46          | 36.7 ± 0.64       | 4  | -74.9 ± 0.65            | 5.95 ± 0.35         | 4 |
| [311:407] | +30.0 ± 4.10          | 29.9 ± 2.26       | 4  | -41.4 ± 1.47            | 5.57 ± 0.75         | 4 |
| [311:408] | +101 ± 10.9           | 55.6 ± 3.33       | 3  | -40.2 ± 2.51            | 9.64 ± 1.13         | 5 |
| [311:412] | +28.4 ± 3.67          | 42.6 ± 2.31       | 4  | -71.1 ± 1.36            | 13.2 ± 0.60         | 3 |
| [313:400] | -25.3 ± 2.72          | 54.4 ± 9.11       | 4  | -104 ± 1.05             | 6.40 ± 0.28         | 4 |
| [313:404] | -                     | -                 |    | -                       | -                   |   |
| [313:407] | +16.2 ± 2.74          | 37.1 ± 3.97       | 4  | -61.5 ± 1.69            | 8.82 ± 0.22         | 4 |
| [313:408] | +38.4 ± 4.01          | 43.5 ± 2.27       | 5  | -75.6 ± 2.18            | 10.5 ± 1.33         | 4 |
| [313:412] | +5.25 ± 3.18          | 32.6 ± 1.15       | 4  | -84.8 ± 1.61            | 10.2 ± 0.70         | 5 |
| [322:400] | +5.80 ± 0.50          | 33.1 ± 1.04       | 5  | -83.1 ± 1.73            | 6.88 ± 0.24         | 5 |
| [322:404] | +18.3 ± 2.97          | 39.6 ± 1.38       | 5  | -92.7 ± 1.66            | 7.37 ± 0.58         | 4 |
| [322:407] | +7.56 ± 1.34          | 28.3 ± 0.40       | 3  | -58.0 ± 0.87            | 8.99 ± 0.75         | 3 |
| [322:408] | -                     | -                 |    | -55.9 ± 1.05            | 8.41 ± 0.47         | 3 |
| [322:412] | 0.002 ± 1.43          | 29.0 ± 1.04       | 6  | -77.2 ± 3.42            | 8.72 ± 1.55         | 5 |
| [323:400] | +5.32 ± 5.48          | 49.9 ± 6.72       | 4  | -104 ± 1.10             | 6.52 ± 0.30         | 5 |
| [323:404] | +23.2 ± 2.38          | 44.2 ± 1.54       | 10 | -77.7 ± 2.12            | 6.78 ± 0.93         | 4 |
| [323:407] | +8.14 ± 1.16          | 33.4 ± 1.67       | 3  | -69.6 ± 0.11            | 6.32 ± 0.28         | 4 |
| [323:408] | -                     | -                 |    | -74.3 ± 0.88            | 7.17 ± 0.56         | 3 |
| [323:412] | +5.75 ± 0.68          | 34.4 ± 0.20       | 4  | -88.8 ± 0.52            | 9.27 ± 0.26         | 4 |
| [326:400] | -4.31 ± 0.55          | 24.2 ± 0.16       | 5  | -62.6 ± 0.34            | 5.51 ± 0.23         | 5 |
| [326:404] | +46.3 ± 8.20          | 53.0 ± 2.66       | 8  | -84.2 ± 2.01            | 8.75 ± 1.05         | 6 |
| [326:407] | +48.3 ± 4.63          | 43.0 ± 3.08       | 8  | -35.5 ± 3.20            | 13.6 ± 2.07         | 5 |
| [326:408] | -                     | -                 |    | -                       | -                   |   |
| [326:412] | +35.8 ± 1.38          | 48.3 ± 2.40       | 5  | -56.6 ± 0.98            | 9.24 ± 0.46         | 7 |

## Wollberg & Bähring, Supporting Material

|                       |              |                          |    |              |             |   |
|-----------------------|--------------|--------------------------|----|--------------|-------------|---|
| [wt]-[wt]             | -3.13 ± 1.28 | 32.3 ± 0.75              | 3  | -62.9 ± 0.60 | 4.72 ± 0.18 | 3 |
| [wt]-[309]            | -3.69 ± 1.84 | 23.7 ± 1.85              | 3  | -69.8 ± 1.81 | 4.63 ± 0.25 | 3 |
| [412]-[wt]            | -6.63 ± 0.76 | 26.8 ± 1.26              | 7  | -85.5 ± 1.56 | 7.44 ± 0.81 | 7 |
| [412]-[309]           | -6.98 ± 0.96 | 27.2 ± 1.14              | 5  | -81.5 ± 1.09 | 7.10 ± 0.16 | 5 |
| [wt]-[wt] (+K+D)      | -12.1 ± 1.65 | 23.7 ± 0.51 <sup>a</sup> | 4  | -64.3 ± 0.24 | 7.16 ± 0.31 | 4 |
| [322]-[wt] (+K+D)     | -            | -                        |    | -71.6 ± 0.68 | 6.11 ± 0.20 | 3 |
| [404]-[wt] (+K+D)     | -6.80 ± 4.81 | 31.8 ± 1.93 <sup>a</sup> | 6  | -58.1 ± 1.11 | 10.9 ± 0.77 | 5 |
| [322:404]-[wt] (+K+D) | -10.4 ± 5.55 | 30.4 ± 2.24              | 7  | -78.0 ± 3.95 | 5.21 ± 0.43 | 7 |
| [wt]-[322]            | -1.04 ± 1.29 | 27.5 ± 0.21              | 4  | -69.1 ± 0.73 | 6.45 ± 0.19 | 4 |
| [404]-[wt]            | +24.1 ± 1.42 | 42.7 ± 1.95              | 12 | -56.2 ± 1.70 | 12.0 ± 0.96 | 4 |
| [404]-[322]           | +6.20 ± 1.40 | 33.1 ± 0.85              | 8  | -81.4 ± 0.97 | 5.12 ± 0.52 | 6 |
| [wt]-[323]            | -9.94 ± 2.29 | 25.5 ± 0.83              | 5  | -74.0 ± 3.03 | 5.54 ± 0.37 | 3 |
| [wt]-[404]            | -19.1 ± 1.67 | 18.3 ± 0.57              | 3  | -62.1 ± 0.54 | 4.60 ± 0.19 | 3 |
| [wt]-[323:404]        | -12.8 ± 1.45 | 21.9 ± 0.36              | 5  | -60.9 ± 1.84 | 4.47 ± 0.28 | 4 |
| [404]-[323]           | -14.4 ± 1.12 | 28.9 ± 0.39              | 8  | -91.2 ± 0.47 | 5.13 ± 0.11 | 8 |
| [326]-[wt]            | +17.7 ± 1.40 | 34.1 ± 0.91              | 5  | -56.2 ± 1.17 | 7.11 ± 0.37 | 6 |
| [326:404]-[wt]        | +22.0 ± 2.52 | 31.3 ± 2.27              | 6  | -68.1 ± 1.07 | 4.64 ± 0.30 | 6 |
| [wt]-[326]            | +5.90 ± 1.74 | 31.0 ± 1.33              | 4  | -70.4 ± 1.88 | 6.83 ± 0.54 | 3 |
| [404]-[326]           | +48.3 ± 5.78 | 50.2 ± 2.92              | 8  | -95.8 ± 3.22 | 10.0 ± 0.52 | 5 |

Voltages of half-maximal activation ( $V_{1/2,act}$ ) and inactivation ( $V_{1/2,inact}$ ) and corresponding slope-factors ( $k_{act}$  and  $k_{inact}$ ) for all Kv4.2 constructs used in the present study. Analysis of voltage dependences: Peak conductance-voltage (GV) relationships were determined based on the equation  $G = I_p / (V - V_{rev})$ ; where  $I_p$  is the peak current amplitude at the test voltage  $V$ , and  $V_{rev}$  is the potassium reversal potential (-90 mV in our experiments). GV relationships were analysed with a fourth-order Boltzmann-function of the form  $G / G_{max} = (m / (1 + \exp((V - V')/k_{act})))^4$ ; where  $G / G_{max}$  is the normalized peak conductance at the test voltage  $V$ . In some cases the GV curve did not saturate within the range of test voltages studied, and the GV data were re-normalized to  $m$  (extrapolated maximum) and re-fitted by the same equation. The voltage dependence is defined by  $V'$  (6.5% of the maximal conductance) and the slope factor  $k_{act}$ , however, the  $V_{1/2,act}$  values given in the table are the voltages where the above function has a value of 0.5. The voltage dependence of isochronal (30 s prepulse) inactivation was analysed with a first-order Boltzmann-function of the form  $I / I_{max} = 1 / (1 + \exp((V - V_{1/2,inact})/k_{inact}))$ ; where  $I / I_{max}$  is the relative current amplitude obtained with the prepulse voltage  $V$ .  $V_{1/2,inact}$  and  $k_{inact}$  are the voltage of halfmaximal inactivation and the slope factor, respectively; <sup>a</sup> note that auxiliary subunit co-expression (+K+D) causes a negative shift in the voltage dependence of activation for [wt]-[wt] and [404]-[wt].

**TABLE S2****Kinetics of onset of low-voltage inactivation in monomeric and tandem-dimer Kv4.2 constructs**

|           | $\tau_1$<br>(s) | $\tau_2$<br>(s) | % $\tau_2$ | n |
|-----------|-----------------|-----------------|------------|---|
| [wt]      | 0.86 ± 0.02     | 8.12 ± 0.33     | 41 ± 3     | 7 |
| [309]     | 0.33 ± 0.03     | 3.03 ± 0.14     | 30 ± 2     | 5 |
| [311]     | 0.32 ± 0.03     | 12.1 ± 5.76     | 30 ± 5     | 4 |
| [313]     | 0.12 ± 0.01     | 2.47 ± 0.66     | 17 ± 1     | 4 |
| [322]     | 1.13 ± 0.25     | 9.37 ± 1.42     | 44 ± 4     | 7 |
| [323]     | 0.25 ± 0.01     | 4.35 ± 1.69     | 12 ± 2     | 6 |
| [326]     | -               | -               | -          | 4 |
| [400]     | 0.62 ± 0.14     | 7.61 ± 1.02     | 49 ± 6     | 3 |
| [404]     | 0.44 ± 0.03     | 4.90 ± 1.29     | 20 ± 4     | 4 |
| [407]     | 1.18 ± 0.07     | 6.51 ± 0.45     | 35 ± 3     | 5 |
| [408]     | 0.65 ± 0.11     | 4.50 ± 1.27     | 45 ± 8     | 7 |
| [412]     | 0.39 ± 0.02     | 1.66 ± 0.03     | 31 ± 1     | 5 |
| [309:404] | 0.09 ± 0.01     | 1.00 ± 0.19     | 26 ± 6     | 6 |
| [309:407] | 1.03 ± 0.02     | 7.40 ± 0.38     | 45 ± 2     | 6 |
| [309:408] | 0.47 ± 0.05     | 10.4 ± 3.84     | 32 ± 4     | 5 |
| [309:412] | 0.45 ± 0.02     | 5.12 ± 0.55     | 23 ± 1     | 5 |
| [311:400] | 0.38 ± 0.11     | 4.10 ± 1.18     | 50 ± 3     | 4 |
| [311:404] | 0.26 ± 0.02     | 4.04 ± 0.36     | 23 ± 0.4   | 5 |
| [311:407] | -               | -               | -          | 6 |
| [311:408] | -               | -               | -          | 5 |
| [311:412] | 0.43 ± 0.08     | 17.3 ± 8.12     | 35 ± 3     | 6 |
| [313:400] | 0.07 ± 0.002    | 0.39 ± 0.03     | 15 ± 1     | 4 |
| [313:404] | 0.26 ± 0.03     | 4.98 ± 1.98     | 27 ± 7     | 3 |
| [313:407] | 0.25 ± 0.01     | 7.53 ± 1.34     | 16 ± 1     | 6 |
| [313:408] | 0.06 ± 0.003    | 0.71 ± 0.06     | 13 ± 1     | 5 |
| [313:412] | 0.15 ± 0.01     | 2.09 ± 0.17     | 18 ± 1     | 5 |
| [322:400] | 0.68 ± 0.11     | 5.45 ± 0.88     | 48 ± 5     | 5 |
| [322:404] | 0.15 ± 0.02     | 1.41 ± 0.28     | 11 ± 1     | 4 |
| [322:407] | 0.90 ± 0.19     | 9.41 ± 1.75     | 40 ± 2     | 5 |
| [322:408] | 0.64 ± 0.19     | 14.8 ± 3.22     | 37 ± 12    | 3 |
| [322:412] | 0.79 ± 0.09     | 9.35 ± 0.60     | 50 ± 3     | 6 |
| [323:400] | 0.14 ± 0.004    | 0.85 ± 0.05     | 19 ± 2     | 6 |
| [323:404] | 0.11 ± 0.02     | 1.18 ± 0.31     | 19 ± 5     | 3 |
| [323:407] | 0.51 ± 0.03     | 4.48 ± 1.07     | 17 ± 1     | 6 |
| [323:408] | 0.43 ± 0.03     | 3.12 ± 0.62     | 16 ± 2     | 6 |
| [323:412] | 0.26 ± 0.003    | 2.02 ± 0.11     | 15 ± 0.3   | 5 |
| [326:400] | 1.40 ± 0.11     | 12.9 ± 0.77     | 44 ± 2     | 5 |
| [326:404] | 0.15 ± 0.03     | 2.49 ± 0.53     | 20 ± 2     | 6 |
| [326:407] | -               | -               | -          | 5 |
| [326:408] | -               | -               | -          | 5 |
| [326:412] | -               | -               | -          | 5 |



## Wollberg & Bähring, Supporting Material

---

|                       |              |             |          |   |
|-----------------------|--------------|-------------|----------|---|
| [wt]-[wt]             | 1.41 ± 0.20  | 12.1 ± 1.35 | 47 ± 11  | 3 |
| [wt]-[309]            | 1.55 ± 0.21  | 8.71 ± 1.40 | 45 ± 1   | 4 |
| [412]-[wt]            | 0.45 ± 0.04  | 2.63 ± 0.38 | 34 ± 3   | 6 |
| [412]-[309]           | 0.57 ± 0.05  | 3.33 ± 0.38 | 30 ± 1   | 5 |
| [wt]-[wt] (+K+D)      | 0.06 ± 0.01  | 2.71 ± 1.05 | 24 ± 4   | 6 |
| [322]-[wt] (+K+D)     | 0.67 ± 0.03  | 5.86 ± 0.56 | 24 ± 2   | 4 |
| [404]-[wt] (+K+D)     | 0.06 ± 0.003 | 0.93 ± 0.50 | 16 ± 4   | 4 |
| [322:404]-[wt] (+K+D) | 0.18 ± 0.05  | 2.26 ± 0.73 | 19 ± 1   | 5 |
| [wt]-[322]            | 0.69 ± 0.01  | 7.91 ± 0.36 | 26 ± 2   | 4 |
| [404]-[wt]            | 0.24 ± 0.03  | 5.18 ± 3.22 | 30 ± 3   | 4 |
| [404]-[322]           | 0.22 ± 0.02  | 1.66 ± 0.31 | 29 ± 3   | 5 |
| [wt]-[323]            | 0.66 ± 0.06  | 5.07 ± 0.35 | 36 ± 2   | 4 |
| [wt]-[404]            | 0.08 ± 0.01  | 0.48 ± 0.18 | 49 ± 8   | 4 |
| [wt]-[323:404]        | -            | -           | -        | 5 |
| [404]-[323]           | 0.10 ± 0.004 | 0.92 ± 0.09 | 7 ± 1    | 8 |
| [326]-[wt]            | 0.42 ± 0.07  | 4.83 ± 0.78 | 27 ± 4   | 6 |
| [326:404]-[wt]        | 1.04 ± 0.44  | 6.98 ± 1.96 | 65 ± 7   | 4 |
| [wt]-[326]            | 0.60 ± 0.03  | 5.56 ± 0.80 | 22 ± 0.3 | 3 |
| [404]-[326]           | 0.12 ± 0.01  | 1.31 ± 0.17 | 19 ± 3   | 5 |

---

Time constants of low-voltage inactivation ( $\tau_1$  and  $\tau_2$ ) obtained by double-exponential fitting of the onset of low-voltage inactivation; %  $\tau_2$ , relative contribution of  $\tau_2$  to the total decay (i.e., to reach ss).

TABLE S3

## S4S5/S6 functional coupling analysis for monomeric and tandem-dimer Kv4.2 constructs

|           | $1 - a_1$         | $K_{trans}$     | $\Omega_{trans}$  | ss                | $K_{steady}$      | $\Omega_{steady}$ | n |
|-----------|-------------------|-----------------|-------------------|-------------------|-------------------|-------------------|---|
| [wt]      | $0.685 \pm 0.008$ | $2.19 \pm 0.08$ |                   | $0.457 \pm 0.032$ | $0.88 \pm 0.11$   |                   | 7 |
| [309]     | $0.358 \pm 0.025$ | $0.57 \pm 0.06$ |                   | $0.088 \pm 0.009$ | $0.10 \pm 0.01$   |                   | 5 |
| [311]     | $0.891 \pm 0.017$ | $9.09 \pm 2.08$ |                   | $0.837 \pm 0.033$ | $6.33 \pm 2.06$   |                   | 4 |
| [313]     | $0.286 \pm 0.023$ | $0.41 \pm 0.04$ |                   | $0.142 \pm 0.018$ | $0.17 \pm 0.02$   |                   | 4 |
| [322]     | $0.740 \pm 0.042$ | $3.31 \pm 0.49$ |                   | $0.540 \pm 0.054$ | $1.35 \pm 0.27$   |                   | 7 |
| [323]     | $0.224 \pm 0.024$ | $0.30 \pm 0.04$ |                   | $0.117 \pm 0.016$ | $0.13 \pm 0.02$   |                   | 6 |
| [326]     | -                 | -               |                   | $0.899 \pm 0.020$ | $10.5 \pm 2.79$   |                   | 4 |
| [400]     | $0.583 \pm 0.068$ | $1.56 \pm 0.49$ |                   | $0.195 \pm 0.039$ | $0.25 \pm 0.06$   |                   | 3 |
| [404]     | $0.292 \pm 0.051$ | $0.44 \pm 0.11$ |                   | $0.117 \pm 0.026$ | $0.14 \pm 0.03$   |                   | 4 |
| [407]     | $0.804 \pm 0.010$ | $4.16 \pm 0.29$ |                   | $0.700 \pm 0.010$ | $2.34 \pm 0.12$   |                   | 5 |
| [408]     | $0.911 \pm 0.014$ | $12.5 \pm 2.56$ |                   | $0.832 \pm 0.016$ | $5.31 \pm 0.62$   |                   | 7 |
| [412]     | $0.320 \pm 0.014$ | $0.47 \pm 0.03$ |                   | $0.016 \pm 0.002$ | $0.02 \pm 0.002$  |                   | 5 |
| [309:404] | $0.392 \pm 0.058$ | $0.77 \pm 0.26$ | $6.78 \pm 2.92$   | $0.182 \pm 0.018$ | $0.23 \pm 0.03$   | $15.2 \pm 5.03$   | 6 |
| [309:407] | $0.576 \pm 0.029$ | $1.41 \pm 0.14$ | $1.31 \pm 0.22$   | $0.228 \pm 0.031$ | $0.31 \pm 0.05$   | $1.18 \pm 0.28$   | 6 |
| [309:408] | $0.934 \pm 0.013$ | $17.5 \pm 4.27$ | $5.41 \pm 1.83$   | $0.901 \pm 0.020$ | $11.9 \pm 3.68$   | $20.2 \pm 7.47$   | 5 |
| [309:412] | $0.468 \pm 0.020$ | $0.89 \pm 0.07$ | $7.26 \pm 1.08$   | $0.306 \pm 0.023$ | $0.45 \pm 0.04$   | $250 \pm 59.4$    | 5 |
| [311:400] | $0.791 \pm 0.024$ | $3.97 \pm 0.58$ | $1.63 \pm 0.26$   | $0.588 \pm 0.029$ | $1.47 \pm 0.20$   | $1.22 \pm 0.37$   | 4 |
| [311:404] | $0.350 \pm 0.019$ | $0.54 \pm 0.05$ | $3.34 \pm 0.10$   | $0.161 \pm 0.025$ | $0.20 \pm 0.04$   | $4.98 \pm 0.09$   | 5 |
| [311:407] | -                 | -               | -                 | $0.964 \pm 0.009$ | $34.0 \pm 6.86$   | $2.01 \pm 0.81$   | 6 |
| [311:408] | -                 | -               | -                 | $0.932 \pm 0.014$ | $16.2 \pm 3.10$   | $2.37 \pm 0.17$   | 5 |
| [311:412] | $0.731 \pm 0.010$ | $2.74 \pm 0.15$ | $1.40 \pm 0.34$   | $0.584 \pm 0.020$ | $1.43 \pm 0.11$   | $12.7 \pm 4.77$   | 6 |
| [313:400] | $0.146 \pm 0.010$ | $0.17 \pm 0.01$ | $1.69 \pm 0.20$   | $0.002 \pm 0.002$ | $0.002 \pm 0.002$ | $26.8 \pm 0.04$   | 4 |
| [313:404] | $0.604 \pm 0.048$ | $1.61 \pm 0.36$ | $20.0 \pm 7.00$   | $0.459 \pm 0.038$ | $0.86 \pm 0.12$   | $33.7 \pm 11.6$   | 3 |
| [313:407] | $0.575 \pm 0.034$ | $1.43 \pm 0.20$ | $1.85 \pm 0.35$   | $0.495 \pm 0.041$ | $1.05 \pm 0.17$   | $2.36 \pm 0.60$   | 6 |
| [313:408] | $0.534 \pm 0.051$ | $1.29 \pm 0.33$ | $1.80 \pm 0.19$   | $0.465 \pm 0.056$ | $0.98 \pm 0.27$   | $1.03 \pm 0.34$   | 5 |
| [313:412] | $0.221 \pm 0.026$ | $0.29 \pm 0.05$ | $3.31 \pm 0.70$   | $0.053 \pm 0.027$ | $0.06 \pm 0.03$   | $19.6 \pm 11.6$   | 5 |
| [322:400] | $0.518 \pm 0.043$ | $1.14 \pm 0.19$ | $2.07 \pm 0.19$   | $0.080 \pm 0.003$ | $0.09 \pm 0.003$  | $4.37 \pm 0.08$   | 5 |
| [322:404] | $0.140 \pm 0.018$ | $0.16 \pm 0.02$ | $1.76 \pm 0.19$   | $0.039 \pm 0.020$ | $0.04 \pm 0.02$   | $5.37 \pm 0.12$   | 4 |
| [322:407] | $0.835 \pm 0.021$ | $5.48 \pm 0.88$ | $1.15 \pm 0.20$   | $0.728 \pm 0.028$ | $2.83 \pm 0.40$   | $1.28 \pm 0.22$   | 5 |
| [322:408] | $0.866 \pm 0.044$ | $8.55 \pm 3.37$ | $2.21 \pm 0.21$   | $0.794 \pm 0.045$ | $4.26 \pm 0.94$   | $1.92 \pm 0.18$   | 3 |
| [322:412] | $0.646 \pm 0.026$ | $1.89 \pm 0.18$ | $2.64 \pm 0.50$   | $0.292 \pm 0.016$ | $0.42 \pm 0.03$   | $16.7 \pm 4.74$   | 6 |
| [323:400] | $0.222 \pm 0.018$ | $0.29 \pm 0.03$ | $1.37 \pm 0.50$   | $0.036 \pm 0.004$ | $0.04 \pm 0.01$   | $1.00 \pm 0.34$   | 6 |
| [323:404] | $0.255 \pm 0.075$ | $0.37 \pm 0.13$ | $6.26 \pm 2.88$   | $0.090 \pm 0.044$ | $0.10 \pm 0.05$   | $5.01 \pm 2.94$   | 3 |
| [323:407] | $0.475 \pm 0.015$ | $0.91 \pm 0.05$ | $1.62 \pm 0.28$   | $0.372 \pm 0.013$ | $0.59 \pm 0.03$   | $1.66 \pm 0.34$   | 6 |
| [323:408] | $0.422 \pm 0.021$ | $0.74 \pm 0.07$ | $2.27 \pm 0.12$   | $0.311 \pm 0.015$ | $0.46 \pm 0.03$   | $1.79 \pm 0.13$   | 6 |
| [323:412] | $0.205 \pm 0.006$ | $0.26 \pm 0.01$ | $4.04 \pm 0.66^a$ | $0.068 \pm 0.005$ | $0.07 \pm 0.01$   | $29.8 \pm 7.48$   | 5 |
| [326:400] | $0.850 \pm 0.005$ | $5.69 \pm 0.25$ | -                 | $0.730 \pm 0.013$ | $2.75 \pm 0.19$   | $1.08 \pm 0.36$   | 5 |
| [326:404] | $0.471 \pm 0.029$ | $0.92 \pm 0.11$ | -                 | $0.339 \pm 0.019$ | $0.52 \pm 0.05$   | $3.12 \pm 0.13$   | 6 |
| [326:407] | -                 | -               | -                 | $0.961 \pm 0.017$ | $73.0 \pm 43.5$   | $2.60 \pm 1.73$   | 5 |
| [326:408] | -                 | -               | -                 | $0.829 \pm 0.009$ | $4.92 \pm 0.31$   | $12.9 \pm 0.02$   | 5 |
| [326:412] | -                 | -               | -                 | $0.879 \pm 0.015$ | $7.76 \pm 0.99$   | $40.2 \pm 14.0^a$ | 5 |

## Wollberg & Bähring, Supporting Material

|                       |               |             |                          |               |              |                          |   |
|-----------------------|---------------|-------------|--------------------------|---------------|--------------|--------------------------|---|
| [wt]-[wt]             | 0.830 ± 0.030 | 5.34 ± 1.34 |                          | 0.664 ± 0.065 | 2.18 ± 0.52  |                          | 3 |
| [wt]-[309]            | 0.679 ± 0.045 | 2.30 ± 0.46 |                          | 0.413 ± 0.090 | 0.83 ± 0.27  |                          | 4 |
| [412]-[wt]            | 0.382 ± 0.032 | 0.64 ± 0.08 |                          | 0.064 ± 0.015 | 0.07 ± 0.02  |                          | 6 |
| [412]-[309]           | 0.339 ± 0.023 | 0.52 ± 0.05 | 1.90 ± 0.68              | 0.054 ± 0.016 | 0.06 ± 0.02  | 2.20 ± 1.28              | 5 |
| [wt]-[wt] (+K+D)      | 0.735 ± 0.031 | 3.02 ± 0.44 |                          | 0.646 ± 0.045 | 2.01 ± 0.29  |                          | 6 |
| [322]-[wt] (+K+D)     | 0.406 ± 0.029 | 0.70 ± 0.08 |                          | 0.223 ± 0.029 | 0.29 ± 0.05  |                          | 4 |
| [404]-[wt] (+K+D)     | 0.752 ± 0.034 | 3.24 ± 0.49 |                          | 0.709 ± 0.030 | 2.53 ± 0.30  |                          | 4 |
| [322:404]-[wt] (+K+D) | 0.226 ± 0.020 | 0.30 ± 0.03 | 2.53 ± 0.11              | 0.041 ± 0.013 | 0.04 ± 0.02  | 8.37 ± 0.05              | 5 |
| [wt]-[322]            | 0.527 ± 0.029 | 1.14 ± 0.15 |                          | 0.361 ± 0.028 | 0.57 ± 0.07  |                          | 4 |
| [404]-[wt]            | 0.770 ± 0.016 | 3.42 ± 0.31 |                          | 0.670 ± 0.029 | 2.11 ± 0.29  |                          | 4 |
| [404]-[322]           | 0.358 ± 0.035 | 0.58 ± 0.10 | 1.26 ± 0.27              | 0.094 ± 0.032 | 0.11 ± 0.04  | 5.07 ± 0.10              | 5 |
| [wt]-[323]            | 0.453 ± 0.039 | 0.86 ± 0.13 |                          | 0.149 ± 0.033 | 0.18 ± 0.04  |                          | 4 |
| [wt]-[404]            | 0.889 ± 0.021 | 8.84 ± 1.62 |                          | 0.762 ± 0.058 | 3.96 ± 1.08  |                          | 4 |
| [wt]-[323:404]        | -             | -           | -                        | 0.607 ± 0.058 | 1.80 ± 0.43  | 5.48 ± 2.68              | 5 |
| [404]-[323]           | 0.076 ± 0.009 | 0.08 ± 0.01 | 6.62 ± 0.05              | 0.004 ± 0.003 | 0.01 ± 0.003 | 39.4 ± 0.02              | 8 |
| [326]-[wt]            | 0.817 ± 0.016 | 4.66 ± 0.49 |                          | 0.751 ± 0.013 | 3.07 ± 0.22  |                          | 6 |
| [326:404]-[wt]        | 0.794 ± 0.039 | 4.23 ± 0.80 | 1.42 ± 0.49              | 0.382 ± 0.071 | 0.68 ± 0.18  | 4.40 ± 0.09              | 4 |
| [wt]-[326]            | 0.606 ± 0.026 | 1.56 ± 0.17 |                          | 0.496 ± 0.032 | 1.00 ± 0.13  |                          | 3 |
| [404]-[326]           | 0.406 ± 0.026 | 0.70 ± 0.07 | 1.44 ± 0.21 <sup>a</sup> | 0.269 ± 0.013 | 0.37 ± 0.02  | 2.62 ± 0.12 <sup>a</sup> | 5 |

Coupling coefficients for the transitory state ( $\Omega_{\text{trans}}$ ) and steady-state inactivation ( $\Omega_{\text{steady}}$ ) were obtained with double-mutant cycle analysis based on  $K_{\text{trans}}$  and  $K_{\text{steady}}$  values;  $K_{\text{trans}} = (1 - a_1) / a_1$ ;  $K_{\text{steady}} = ss / (1 - ss)$ . Fractions  $a_1$  and  $ss$  were obtained with double-exponential fitting of onset of low-voltage inactivation (see Materials and Methods). <sup>a</sup> SEM values based on linear and independent error propagation.
